# Supplementary material for: Reprogrammed CRISPR-Cas9 targeting the conserved regions of HPV6/11 E7 genes inhibits proliferation and induces apoptosis in E7-transformed keratinocytes
Source: PubMed Central journal article supplement — Asian J Androl. 2015 Jul 31;18(3):475–9. doi: 10.4103/1008-682X.157399 (PMC4854108; doi:10.4103/1008-682x.157399), 2015-07-31
Supplement: AJA-18-475_Suppl1.pdf [file AJA-18-475_Suppl1.pdf]

## SUPPLEMENTAL FILES

### Supplemental File 1

The cDNA sequences of sgRNA-1:

CATAGCAATGTAACCCCTACAGTTTTAGAGCTAGAAATAGCAAG  
TAAAATAAGGCTAGTCCGTTATCAACTTGAAAAAGTGGCA  
CCGAGTCGGTGCTTTTTT

The cDNA sequences of sgRNA-2:

AGACAGCTCAGAAGATGAGGGTTTTAGAGCTAGAAATAGCA  
AGTTAAAATAAGGCTAGTCCGTTATCAACTTGAAAAAGTGG  
CACCGAGTCGGTGCTTTTTT.

### Supplemental File 2

Detailed information of vector pCRISPR-CG01:

1. Plasmid profile

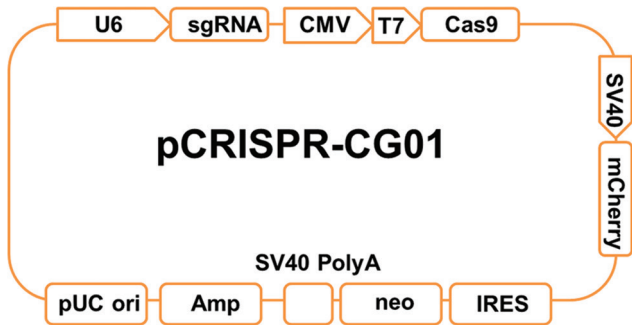

- Whole plasmid size: 10441 bp
- Antibiotic: Ampicillin
- Stable selection marker: Neomycin
- Suggested sequencing primers: Forward: 5'-TTCTTGGGTAGTTTTGCAG-3', Reverse: 5'-CCTATTGGCGTTACTATG-3'.

### Supplemental File 3

DNA sequences for the PCR products from different clones:

#### HPV11 E7

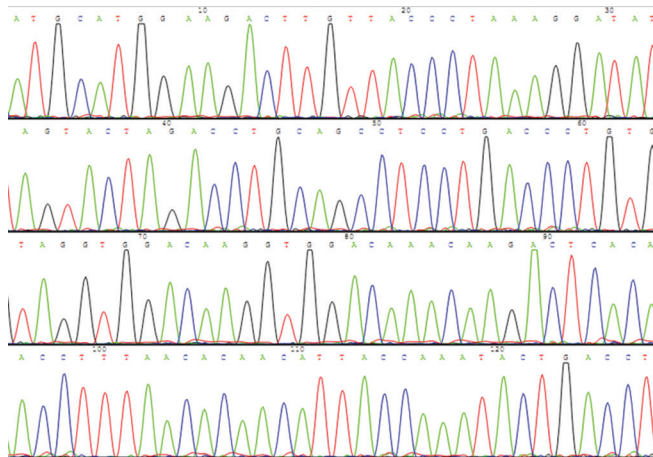

Clone 1

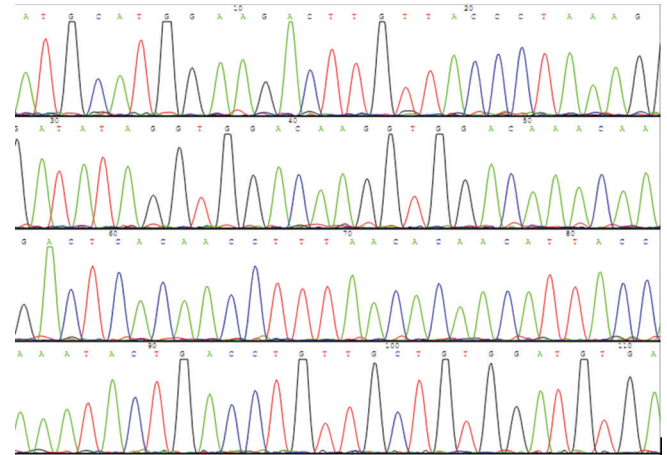

Clone 2

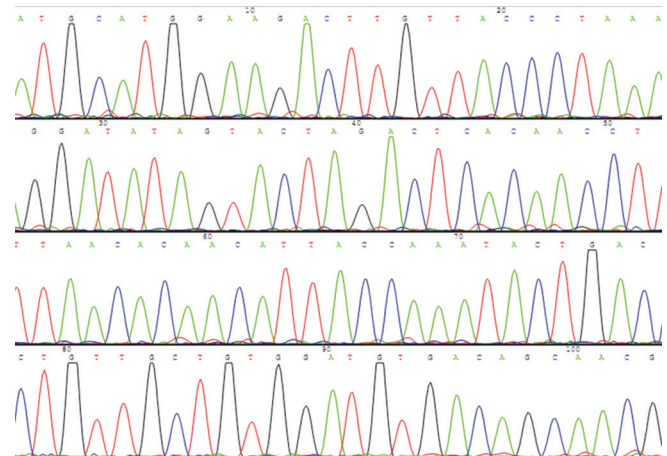

Clone 3

#### HPV6 E7

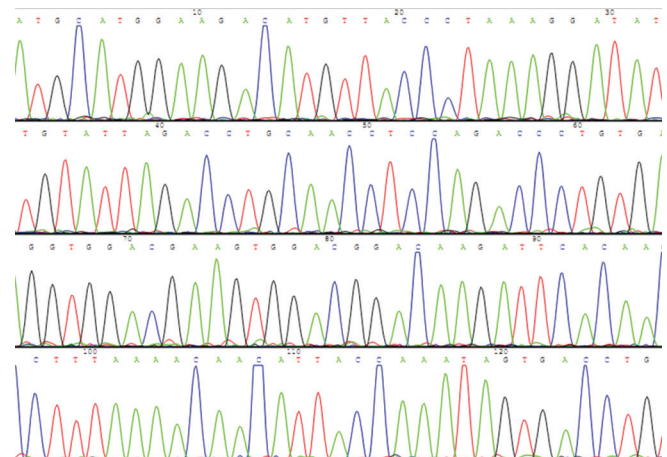

Clone 1

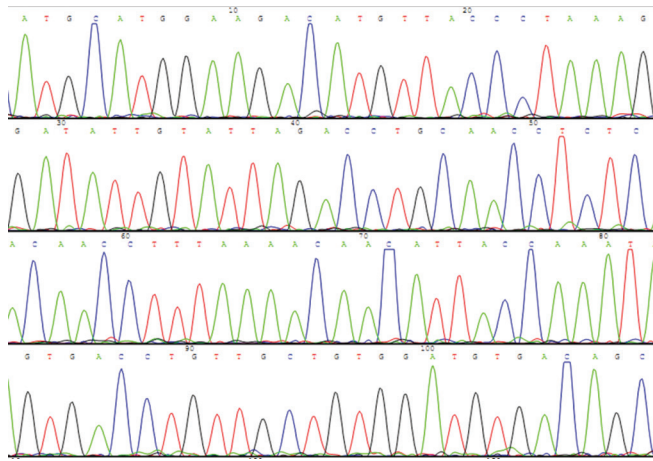

**Clone 2**

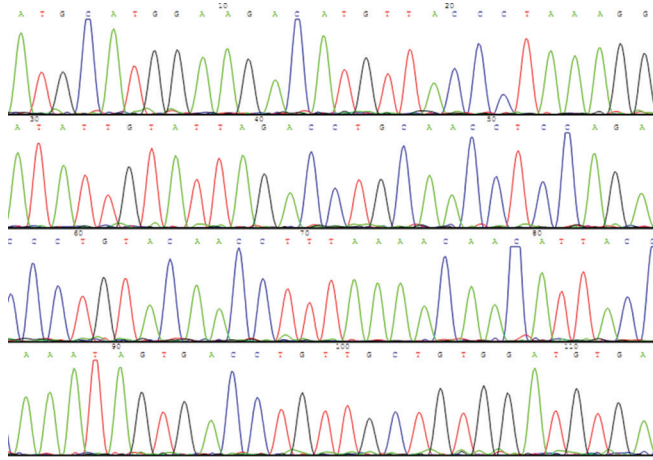

**Clone 3**
